# Supplementary material for: PROgesterone Therapy for Endometrial Cancer Prevention in Obese Women (PROTEC) Trial: A Feasibility Study
Source: Oxford University Press journal article supplement (doi:10.1158/1940-6207.capr-20-0248), 2020-09-30
Supplement: 19406207capr200248-sup-243497_2_supp_6576991_qgpwj4.docx [file 19406207capr200248-sup-243497_2_supp_6576991_qgpwj4.docx]

**Table S1 Immunohistochemical antibodies and protocols**

| **Antibody** | **Clone** | **Manufacturer** | **Species** | **Catalogue number** | **Antigen retrieval** | **Antibody dilution** | **Incubation time** | **Detection kit** | **Additional steps** |
| --- | --- | --- | --- | --- | --- | --- | --- | --- | --- |
| Ki67 | MIB-1 | Dako | Mouse mAb | M724029-2 | 30 minute heat in CC1 buffer | 1+100 | 32 min | Ultraview DAB | Ultrawash |
| pAKT  (Ser473) | D9E | New England Bioscience (Cell Signalling) | Rabbit mAb | 4060L | 60 minute heat in CC1 buffer | 1+100 | 60 min | Ultraview DAB | Ultrawash |
| ER | SP1 | Roche | Rabbit mAb | 790-4324 | 30 minute heat in CC1 buffer | RTU | 32 min | Ultraview DAB | Ultrawash |
| PR | 1E2 | Roche | Rabbit mAb | 790-2223 | 30 minute heat in CC1 buffer | RTU | 30 min | Ultraview DAB | Ultrawash |
| PTEN | 6H2.1 | Dako | Mouse mAb | M362729-2 | *Pressure Cooker | 1+10 | 32 min | Optiview DAB | None |

*Pressure Cooker: Menarini Antigen Access Unit; Pressure: 17 PSI; Heat: 122.50c, Menarini buffer; Access Super RTU. Time: 1 min at full temperature. Full cycle approx 40 minutes.
